# Supplementary material
Source: Springer Nature journal article supplement (https://www.springermedizin.de/resource/supplementary/12890_2008_142_MOESM2_ESM.pdf/9506074)
Supplement: MOESM2 [file 9506074]

Total citations identified  
(n= 2976)

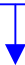

Potentially relevant studies  
(n=304)

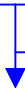

Studies that met the  
inclusion criteria (n=177)

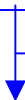

Included Studies  
(n=68)

- Asthma with other comorbidities
- Non English text
- Conference abstracts, case reports, letters, anonymous authors, comments, meta-analysis, editorials and review papers

- No cost analysis
- No Pharmacodynamic or pharmacokinetic studies
- No asthma management or asthma intervention studies
